# Supplementary material
Source: MDPI journal article supplement (https://www.mdpi.com/2225-1154/9/4/56)
Supplement: s1 [file s1]

### Modified Mann-Kendall (MMK) trend test

This study implemented MMK trend test to evaluate the spatial drought trend characteristics over four river basins of south India from 2003-2016. The MMK trend test is performed as follows,

Consider a sequence  $X_T$  and divide it by the mean of this series to obtain a new series  $X_t$ . Null hypothesis ( $H_0$ ): no trend in the series over time. Alternate hypothesis ( $H_1$ ): existence of increasing or decreasing trend.

The trend estimator  $\beta$  of the rank for the new series is calculated as:

$$\beta = \text{median} \left( \frac{x_i - x_j}{i - j} \right) \quad 1 \leq i < j \leq n \quad (1)$$

Where  $\beta > 0$  represents upward trend and  $\beta < 0$  represents downward trend.

If the trend part  $T_t$  of the new series  $X_t$  is linear then trend part is removed to obtain the stationary series  $Y_t$ .

$$Y_t = X_t - T_t = X_t - \beta \times t \quad (2)$$

The rank corresponding to series  $Y_t$  is calculated and its corresponding autocorrelation coefficient  $r_i$  is obtained.

$$r_i = \frac{\sum_{k=1}^{n-i} (R_k - \bar{R})(R_{k+i} - \bar{R})}{\sum_{k=1}^n (R_k - \bar{R})^2} \quad (3)$$

where  $\bar{R}$  is the average rank and  $R_i$  is the rank of  $y_i$ .

The variance  $V(S)$  of the trend statistic  $S$  of autocorrelation series is obtained as follows:

$$V(S) = \eta \times \frac{n(n-1)(2n+5)}{18} \quad (4)$$

$$\eta = 1 + \frac{2}{n(n-1)(n-2)} \times \sum_{i=1}^{n-1} (n-i)(n-i-1)(n-i-2)r_i \quad (5)$$

The test statistic  $Z$  is calculated as

$$Z = \begin{cases} \frac{S-1}{\sqrt{V(S)}} & S > 0 \\ 0 & S = 0 \\ \frac{S-1}{\sqrt{V(S)}} & S < 0 \end{cases} \quad (6)$$

If  $|Z_s| < Z_{0.05/2}$  for a given significance level  $\alpha$ , then the hypothesis ( $H_0$ ) is accepted, otherwise rejected.

### Standardized Precipitation Evapotranspiration Index

Several drought indices were established to evaluate droughts by integrating the climate variables like precipitation, soil moisture, runoff, temperature, and evapotranspiration. SPI is widely used to evaluate the meteorological drought that require only precipitation dataset to compute drought events. As SPI considers only one variable to quantify the drought, it may not reflect the true water deficit in the region. Vicente-Serrano et al. [1] developed a new index named Standardized Precipitation Evapotranspiration Index (SPEI) that considers potential evapotranspiration (PET) along with precipitation, considering all the advantages of SPI. SPEI can be evaluated from 1 to 48-month time scale, representing short-term to multiyear water deficit that result in agricultural, hydrological and meteorological droughts [2-5]. In this study SPEI is evaluated at 12-month timescale. For the SPEI calculation, first the difference between precipitation and PET is calculated.

$$D_i = P_i - PET_i \quad (7)$$

where,  $D_i$  = surplus or deficit in the catchment for the  $i^{th}$  month.

For the computation of PET, the most widely used equations are Penman-Monteith, Hargreaves and Thornthwaite. Due to scarcity of data Penman-Monteith equation is difficult to use. Therefore, because of its simplicity and lower data requirement, Hargreaves method is adopted to evaluate PET in this study. The calculated  $D_i$  values were then accumulated to a 12-month scale. Then the probability distributions were fitted to the aggregated series and best distribution is selected using L-moments method. The cumulative distribution function of the selected distribution is then normalized to compute the SPEI series. Then the method of run concept is adopted to calculate the drought characteristics like severity and duration.

## References

1. Vicente-Serrano, S. M., S. Beguería, and J. I. López-Moreno. 2010. "Amultiscalar drought index sensitive to global warming: The standardized precipitation evapotranspiration index." *J. Clim.* 23 (7): 1696–1718. <https://doi.org/10.1175/2009JCLI2909.1>.
2. McKee, T. B., N. J. Doesken, and J. Kleist. 1993. "The relationship of drought frequency and duration to time scales." In Vol. 17 of *Proc., 8th Conf. on Applied Climatology*, 179–183. Boston: American Meteorological Society.
3. Maccioni, P., M. Kossida, L. Brocca, and T. Moramarco. 2014. "Assessment of the drought hazard in the Tiber River basin in central Italy and a comparison of new and commonly used meteorological indicators." *J. Hydrol. Eng.* 20 (8): 05014029. [https://doi.org/10.1061/\(ASCE\)HE.1943-5584.0001094](https://doi.org/10.1061/(ASCE)HE.1943-5584.0001094).
4. Jain, V. K., R. P. Pandey, M. K. Jain, and H. R. Byun. 2015. "Comparison of drought indices for appraisal of drought characteristics in the Ken River Basin." *Weather Clim. Extremes* 8 (Jun): 1–11. <https://doi.org/10.1016/j.wace.2015.05.002>.
5. Gupta, V.; Jain, M.K.; Singh, V.P. 2020. Multivariate Modeling of Projected Drought Frequency and Hazard over India. *J. Hydrol. Eng.* 25(4): 04020003.
